tion, the large size of the electrode and inaccuracies due to the effect of temperature and of hemoglobin on the electrode. A membrane more permeable to the oxygen molecule would also contribute to the greater utility of the method. Perhaps, the determination of tissue oxygen tension can best be accomplished by depending upon some intrinsic characteristic of the oxygen molecule such as a (1) reduction by electrons; (2) its paramagnetic property; or (3) its "energy level." It is predicted that considerable strides will be made in the very near future in perfecting a better method for determining tissue oxygen tension and eventually *One Step Closer* in determining continuously and, *in vivo*, the oxygen tension of a cell.

STEVENS J. MARTIN, M.D.

#### REFERENCES

1. Comroe, J. H.: *Methods in Medical Research*, Vol. 2. The Year Book Publishers, Inc., 1950.
2. Dressler, Donald P., Mastio, George M. and Albritten, Frank R., Jr.: The clinical application of gas chromatography to the analysis of respiratory gases, *J. of Lab. & Clin. Medicine*, **55**: 144, 1960.
3. Davies, Philip W. and Brink, Frank, Jr.: Micro-electrodes for measuring local oxygen tension in animal tissues. *Rev. Scient. Instruments* **13**: 524, 1942.
4. Comroe, Julius H., et al.: Symposium on tissue oxygen tension, *Federation Proceedings* **16**: 665, 1957.
5. Montgomery, Hugh and Horwitz, Orville: Oxygen tension of tissues by the polarographic method. I. Introduction: oxygen tension and blood flow of the skin of human extremities, *J. Clin. Invest.* **29**: 1120, 1950.
6. Clark, Leland C., Jr., Wolf, Richard, Granger, Donald and Taylor, Zena: Continuous recording of blood oxygen tension by polarography, *J. of Appl. Physiol.* **6**: 189, 1953.
7. Sevringhaus, John W. and Bradley, A. Freeman: Electrodes for blood pO<sub>2</sub> and pCO<sub>2</sub> determination, *J. Appl. Physiol.* **13**: 515, 1958.
8. Sayen, John J., Sheldon, Warner F., Zinsser Harry F., Kuo, P. T., Horwitz, O. and McCallie, David P.: Studies of coronary disease in experimental animals. III. Polarographic studies of intramyocardial oxygen availability in dogs with acute coronary occlusion and narrowing, correlated with epicardial ECG, *J. Clin. Invest.* **30**: 670, 1951.
9. Montgomery, Hugh: Oxygen tension of tissues *in vivo*, The George E. Brown Memorial Lecture, *Circulation*, **15**: 646, 1957.
10. Sugioka, Kenneth and Davis, David A.: Hyperventilation—a possible cause of cerebral hypoxia, *ANESTHESIOLOGY* **21**: 135, 1960.

#### DEDICATION

DEDICATION of the Headquarters Building of the American Society of Anesthesiologists was held in Park Ridge, Illinois, at 3:30 P.M. on May 21, 1960. The officers of the Society, the member of the Board of Directors, and approximately 160 guests were present. Dr. Leo V. Hand, President, presided at the services, and the dedicatory address was delivered by Leonard W. Larson, M.D., Bismark, North Dakota, Chairman of the Board of Trustees of the American Medical Association.\* Dr. Larson's address follows:

"Although dedicatory addresses have become somewhat standardized over the years, I hope you will accept my sincere congratulations and best wishes, on behalf of the American Medical Association and its 178,000 physician-members.

"I am always delighted when any branch of medicine or the allied health sciences demonstrates its progress and achievement in a tangi-

\* Dr. Larson is now President-Elect, American Medical Association.

ble way such as you have done here. But I am particularly pleased that the American Society of Anesthesiologists has grown to maturity in such a relatively short span of years.

"Your stature as a vital member of the great body of medical science has been increasingly evident in the last 30 years. It might be said that anesthesiology is one of the newest sciences, even though its practical application goes back to ancient times.

"But only in recent times has the overflowing development of your science made such a monumental contribution to medical progress. Today, thanks to anesthesiology, the surgeon can perform innumerable operations that were impossible a few years ago.

"The anesthesiologist has evolved from a technician to a highly skilled partner of the surgeon and obstetrician. The modern health team cannot function properly without the anesthesiologist.

"What I have said represents the respect and

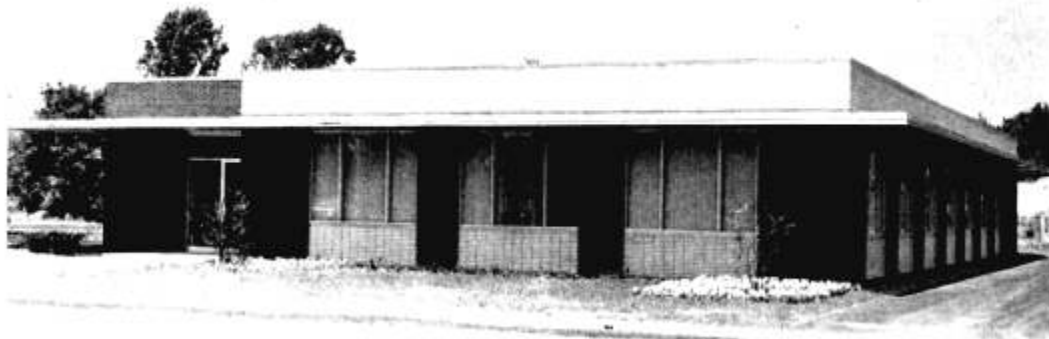

Headquarters Building, The American Society of Anesthesiologists, Inc., 515 Busse Highway, Park Ridge, Illinois.

admiration of the American Medical Association for one of its most important scientific sections, anesthesiology.

"But I have a more personal reason for congratulating you. As a pathologist, I have worked with anesthesiologists and radiologists in the hospital end of American Medicine. Our three specialties have struggled strenuously but successfully from the ranks of technicians to skilled scientific specialties.

"Your new headquarters will be a symbol to the medical world—a symbol of your past progress and a symbol of your future achievements.

"But the medical world is not alone in its gratitude to the anesthesiologists. Every human being whose suffering has been alleviated

. . . whose life has been saved by delicate surgery possible only through your skills . . . or who has been spared misery and pain—these people are your monument.

"The anesthesiologist is often the man-behind-the-scenes, the man whose skill the patient takes for granted. However, were it not for that skill, American Medicine would not be where it is today.

"For the past, your fellow physicians congratulate you. For the present, we rejoice with you in the dedication of this tangible evidence of your greatness. And for the future, we join with you in one of man's noblest ventures—the virtual elimination of pain and suffering."

---

## ANNUAL MEETING

American Society of Anesthesiologists, Inc.

October 2-7, 1960

Statler Hilton Hotel, New York City
